# 1 Delphi: A Deep-learning Method for 2 Polygenic Risk Prediction

3 Costa Georgantas <sup>1,2</sup>, Zoltán Kutalik <sup>2</sup>, and Jonas Richiardi <sup>1,2</sup>

4 <sup>1</sup>Lausanne University Hospital, Lausanne, CH

5 <sup>2</sup>University of Lausanne, Lausanne, CH

6 **Polygenic risk scores (PRS) are relative measures of an individual's genetic propensity to a particular trait or**  
7 **disease. Most PRS methods assume that mutation effects scale linearly with the number of alleles and are**  
8 **constant across individuals. While these assumptions simplify computation, they increase error, particularly**  
9 **for less-represented racial groups. We developed and provide Delphi (deep learning for phenotype inference),**  
10 **a deep-learning method that relaxes these assumptions to produce more predictive PRS. In contrast to other**  
11 **methods, Delphi can integrate up to hundreds of thousands of SNPs as input. We compare our results to a**  
12 **standard, linear PRS model, lasso regression, and a gradient-boosted trees-based method. We show that**  
13 **deep learning can be an effective approach to genetic risk prediction. We report a relative increase in the**  
14 **percentage variance explained compared to the state-of-the-art by 11.4% for body mass index, 18.9% for**  
15 **systolic blood pressure, 7.5% for LDL, 35% for C-reactive protein, 16.2% for height, 29.6 % for pulse rate;**  
16 **in addition, Delphi provides 2% absolute explained variance for blood glucose while other tested methods**  
17 **were non-predictive. Furthermore, we show that Delphi tends to increase the weight of high-effect mutations.**  
18 **This work demonstrates an effective deep learning method for modeling genetic risk that also showed to**  
19 **generalize well when evaluated on individuals from non-European ancestries.**

20 Correspondence: [costa.georgantas@chuv.ch](mailto:costa.georgantas@chuv.ch)

NOTE: This preprint reports new research that has not been certified by peer review and should not be used to guide clinical practice.

## 21 Introduction

22 The total genetic component of common traits and diseases is attributable, at least in part, to a combination of small  
23 effects from a large number of mutations on the entire genome (1). Genome-wide association studies (GWAS) can  
24 identify univariate relationships between common single nucleotide polymorphisms (SNPs) and a given trait. A GWAS  
25 output comprises an estimated effect size coupled with a P-value of association for each tested SNP. A single scalar  
26 indicating relative genetic risk can be obtained by summing up the number of alleles weighted by the estimated  
27 effect size of SNPs, with or without non-genetic risk factors (2). These so-called polygenic risk scores (PRS) are  
28 commonly used to quantify an individual's genetic propensity for a particular trait or disease and have potential clinical  
29 applications in prevention, diagnosis, and treatment (3; 4; 5).

30 Methods for PRS estimation have evolved considerably over the past decade. It was first found that including mutations  
31 below GWAS statistical significance would increase predictive power (6; 7). Taking linkage disequilibrium (LD) into  
32 account by either clumping and thresholding (C+T) or by using a shrinkage method also improved performance (8; 9).  
33 More recent work has included advancements in statistical learning and an improved understanding of biology to  
34 increase the predictive performance of PRS. For instance, Bayesian approaches can also consider minor allele  
35 frequency (MAF) (10) or incorporate functional priors (11) to modify the effect size estimates. These different methods  
36 generally offer marginal improvements over one another and suffer from similar limitations: effects are constant and  
37 scale linearly with the number of alleles.

38 PRS typically become significantly less predictive when applied to other ethnic groups (12). This performance drop  
39 can be partly attributed to allele frequency differences between cohorts and other genetic and environmental factors.  
40 These limitations hinder the application of PRS in medical settings (13), and this performance gap can only be  
41 bridged with additional data collection from under-represented ancestries. Multiple approaches have been proposed  
42 to increase the generalizability of PRS, for instance, by aggregating results from multiple GWAS studies (14; 15) or  
43 prioritizing functional variants (16). Recently, increased prediction performance was observed through the use of a  
44 non-linear model taking a standard PRS and a selection of high-impact SNPs as inputs (17).

45 Deep learning (DL) offers the ability to learn complex patterns directly from large labeled datasets with minimal  
46 assumptions. In genetics, DL has been applied for many problems such as variant calling (18), motif discovery (19),  
47 and image-derived phenotyping for GWAS (20; 21). Explainable DL approaches (22) could provide additional insight  
48 into the genetic factors influencing the disease. Abe et al. recently constructed a knowledge graph (23) to generate  
49 text-based explanations for individual variants. Using deep learning for genetic risk prediction could provide unique  
50 advantages, as overparametrization has recently been shown to improve generalization (24), which is important for  
51 PRS to be applicable in under-represented populations.

52 Using DL for PRS estimation has been attempted before, although the proposed approaches consisted in using shallow  
53 networks (max. 4 fully connected or convolutional layers) on a small set of SNPs (max. 5K) (25; 26; 27; 28; 29; 30). In  
54 those examples, DL was shown only marginally to improve results, if at all. For instance, Badré et al. (28) found that  
55 including 5273 high-impact SNPs in a deep neural network slightly improved the predictive performance of PRS for  
56 breast cancer over logistic regression, and including more SNPs did not improve performance. Zhou et al. (30) showed  
57 that a small neural network with three fully connected layers improved Alzheimer's disease genetic risk prediction in a  
58 small ( $N \approx 10K$ ) cohort.

59 In this work, we propose Delphi (deep learning for phenotype inference), a deep learning method that alleviates some  
60 of the issues of PRS mentioned above by tuning risk score estimates in a data-driven and hypothesis-free manner.  
61 In contrast to previous methods, we use a transformer architecture to capture non-linear interactions. Unlike other  
62 approaches, we modify effect sizes before the summation, allowing allele effects to depend on sex, ethnicity, and  
63 other mutations. Our method can fine-tune effects from any classical PRS method such as LDpred (8) and Lassosum  
64 (9). We report state-of-the-art results for 5 phenotypes from the UK Biobank dataset (UKBB) (31), and show that  
65 Delphi tends to increase the estimated effect of high-impact mutations. We also validate our predictions on individuals  
66 from under-represented ethnicities and show that Delphi generalizes better than other tested approaches.

## Results

### The Delphi framework

At a high level, Delphi (Figure 1) uses genotyping and covariate information to learn perturbations of mutation effect estimates. Our approach contained two main steps. (1) the dataset was split into training, validation, and test sets before pre-processing. Mutation effect sizes were estimated with standard PRS techniques, and genotyping data was converted into a format enabling fast loading during training. (2) In the training step, a covariate model based on gradient-boosted trees (32) estimated the phenotype from age, sex, and ethnicity, and a deep neural network learned to perturb individual effect sizes for all mutations included in the PRS summation. The modified effect sizes were then summed up to form a personalized PRS. The covariate model outputs and the PRS summation were finally linearly combined to form the final prediction.

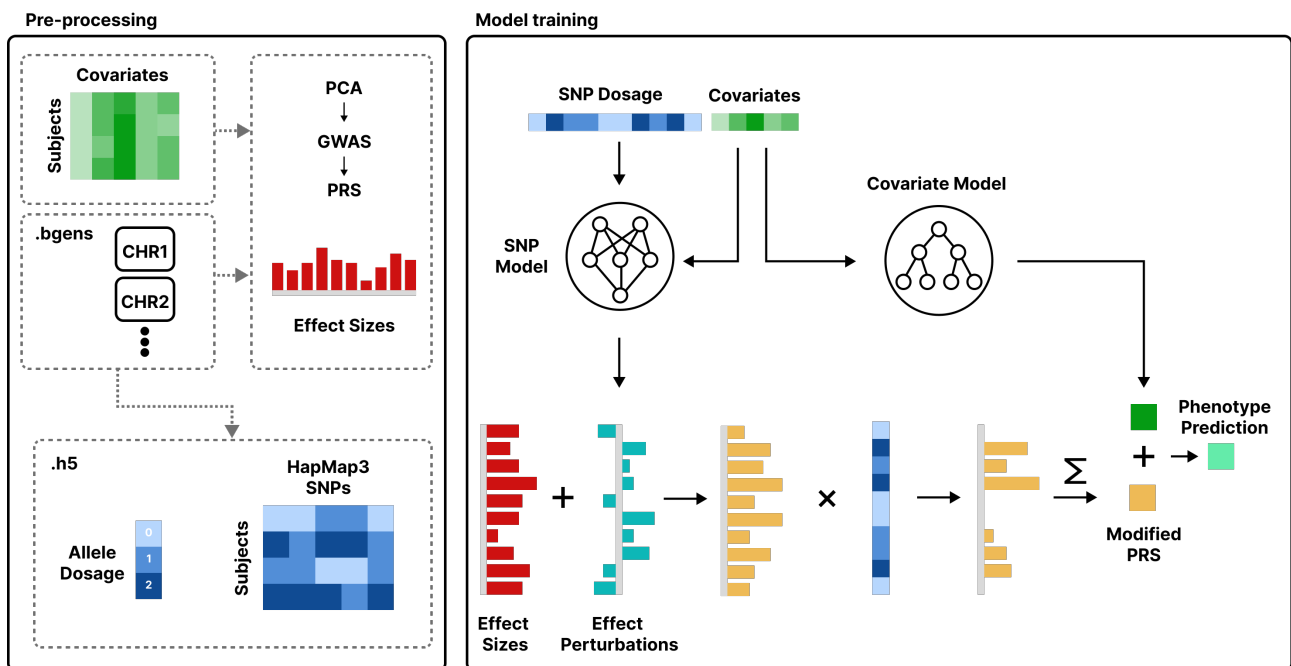

**Figure 1.** Overview of the Delphi framework. The data is split into training, validation, and test sets before pre-processing. A GWAS is conducted for the phenotype in question on the training set, followed by a PRS method. A transformer neural network learns to modify the effect size estimates during training depending on other SNP dosages and covariates on the training data set. Model selection for the neural network and the PRS methods is done using the validation set. Modified effect sizes are summed up and aggregated with the predictions of a boosted trees covariate model to form a new PRS. Prediction results are all evaluated on the held-out test set.

### GWAS and PRS

485'231 UKBB subjects were randomly split into different sets. The training set was used for principal component analysis (PCA), GWAS, PRS computation, and deep neural network training. The validation set was used for PRS validation and model selection after training. The held-out test set remained unseen until the final evaluation. We only considered 1.3M SNPs from the HapMap3 set (33) with an INFO score  $> 0.8$  and MAF  $> 0.01$ . PCA on the genotype matrix was used to capture population structure.

GWAS for all phenotypes only included subjects within the training set from British-white ancestry (UKBB field 22006) to reduce spurious associations, and any subjects further than three standard deviations away from the first six principal components were removed. Sex, age, and the first 20 principal components were used as covariates. Classical PRS methods use LD, MAF, and other measures to reweight the effect estimates. We found some performance improvement by using these re-weighted effect estimates as a baseline instead of the GWAS summary statistics. PRS were obtained with three different methods: C+T, Lassosum (9), and LDpred (8). The pre-processing step was implemented in R, using the bigsnpr (34) library.

### Learning perturbations of mutation effects

The second step consists of learning individualized effect perturbations. As in GWAS, covariates were age, sex, and the first 20 PC loading. Before training, an XGBoost model was fitted on covariate data and is referred to as the

93 covariate model. Separately, the genotype data was converted from .bgen files to a hierarchical format that allows for  
94 fast data retrieval of all HapMap3 SNPs of a small number of subjects. We trained the neural network on the residuals  
95 of this model, which made convergence easier when some covariates had a high impact on the phenotype. The neural  
96 network's architecture was a standard 8-layer transformer with variable sequence length depending on the number of  
97 input SNPs. SNPs were aggregated into fixed-size groups and linearly mapped to form a sequence of embeddings of  
98 size 512. In addition, covariates were included as the first embedding in the sequence, and zero padding was used  
99 when necessary. The transformer's output was then mapped back into a vector the size of the number of input SNPs.  
100 This vector represents individualized variations in the SNP effect. As in traditional PRS methods, these modified  
101 effects were then summed up and linearly mapped in combination with the output of the covariate model to form a  
102 final prediction. A graphical overview of the method is presented in figure 1.

## 103 Baseline PRS results

104 Three PRS methods (C+T, Lassosum2, and LDpred2) were compared to provide baselines. We compared the  
105 proportion of explained variance (EVR) for all phenotypes. Predictions were made with a linear or logistic model, using  
106 age, sex, and the first 20 genetic PCs as covariates and the estimated score. Our results are displayed in Figure 2.  
107 LDpred2 outperformed the other two tested methods on all tested phenotypes. Thus, we chose the effect estimates  
108 from LDpred2 as the baseline for our method in all further analyses. We also compared the performance of three  
109 variants of LDpred2: LDpred2-grid and LDpred2-auto. We found that LDpred2-auto was superior to LDpred2-grid for  
110 all tested phenotypes and used this variant.

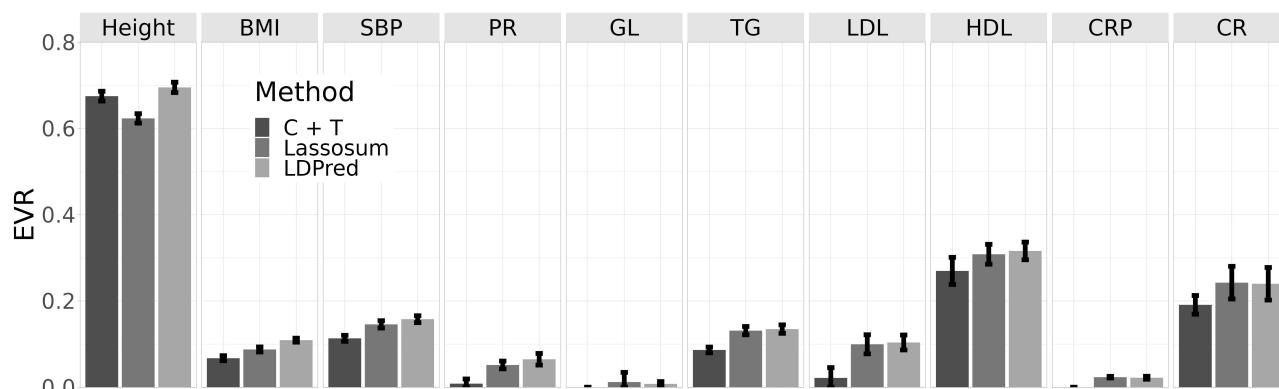

**Figure 2.** C+T, Lassosum2 and LDpred2 linear PRS results. We show the best-performing model of three independent data splits. Validation sets were used to determine the optimal parameters for each method. Error bars indicate the standard deviation between splits. EVR: explained variance, BMI: Body mass index, CRP: C-Reactive protein, GL: glucose, LDL: low-density lipoproteins, SBP: systolic blood pressure.

## 111 Trait Prediction

112 We evaluated the performance of Delphi on ten continuous phenotypes, using three different train/test splits, and  
113 used explained variance as performance metrics. We also compared Delphi with linear and Lasso regressions and an  
114 approach using XGBoost to modify effect sizes (17) with the base weights from LDpred. Hyperparameters for all three  
115 methods were tuned with three-way cross-validation on the same validation set. Results showed that Delphi resulted  
116 in lower error than other approaches on all phenotypes Figure 3 provides detailed results.

117 We then compared Delphi prediction to the next best method, XGboost, in terms of the distribution of errors for ten  
118 phenotypes. Delphi generally tended to have fewer large prediction errors, as shown by the ratio of quartile difference  
119 between the two methods (Figure 4). This is especially visible for height, for which ratios had to be bounded between  
120 0.9 and 1.1 for visibility. This difference in prediction distribution is also visible from histograms of distances between  
121 predicted and ground truth decile values, as shown in figure 5.

122 Predictions for Delphi showed, in general, lower absolute error than XGboost prediction (supplementary section 1).  
123 The relative increase in the percentage variance explained compared to the state-of-the-art was 11% for body mass  
124 index, 19% for systolic blood pressure, and 35% for C-reactive protein; in addition, Delphi provided 2% absolute  
125 explained variance for blood glucose while other tested methods were non-predictive.

## 126 Performance comparison on non-white British for multiple phenotypes

127 We also compared performance on the subset of the test set with non-British white ancestries ( $N \approx 13K$ , depending on  
128 split and phenotype). Ancestry was determined according to Field 22006, which indicates subjects who self-identified

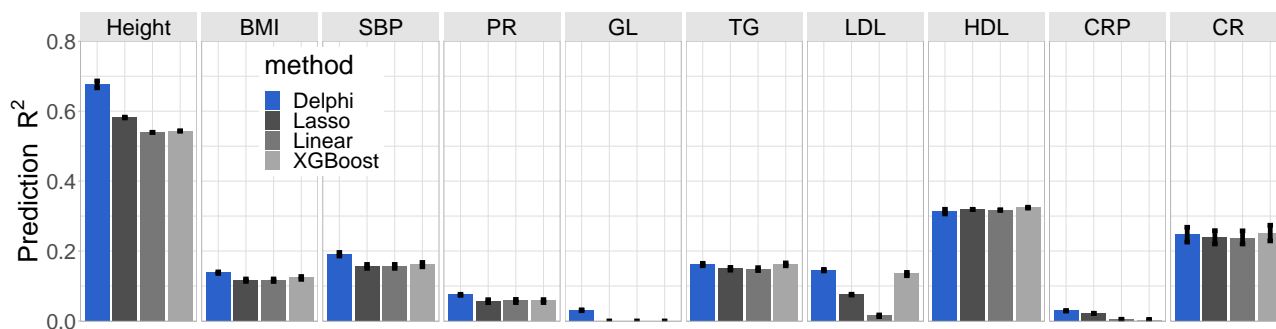

**Figure 3.** Accuracy of polygenic predictions for ten phenotypes in the UK Biobank. We report results for a linear PRS model, lasso regression, and XGBoost models, including the dosage of multiple high-impact SNPs as input, and our method. See Figure 2 for acronyms.

129 as 'White British' according to Field 21000 and have very similar genetic ancestry based on a principal components  
130 analysis of the genotypes. Results are shown in Figure 6. The relative increase in the percentage variance explained  
131 compared to the state-of-the-art was 18% for body mass index, 25% for systolic blood pressure, 2% for LDL, and 15%  
132 for C-reactive protein; in addition, Delphi provided 2% absolute explained variance for blood glucose while other tested  
133 methods were non-predictive. Notably, the EVR is higher for non-British white individuals for some phenotypes (BMI  
134 and LDL). This predictive gain is due to the reduction of the total variance and is not reflected in the mean absolute  
135 error (see supplementary section 1).

136 We also compared performance on subsets of the test set that self-reported as either African ( $N \approx 560$ ), Chinese  
137 ( $N \approx 290$ ), or Indian ( $N \approx 920$ ). Results are shown in figure 7. Despite the low number of subjects in each group, Delphi  
138 outperforms other tested approaches on most phenotypes.

### 139 Observed Trends in Effect modulation

140 We observed interesting patterns when inspecting the average effect modulations before the summation. As shown in  
141 Figure 8, Delphi tends to down-weight the absolute effect of SNPs with low absolute effect. Interestingly, we do not  
142 observe the same trend when grouping SNPs by minor allele frequency decile. Other SNP-heritability estimation  
143 methods such as LDAK (35) include MAF and LD estimates to refine predictions. As LDpred modifies the effect  
144 estimates before any modification by the deep neural network, we expect the LD structure to be included in the effect  
145 estimates. This observation might indicate that the absolute effect may be an additional parameter of interest for  
146 future Bayesian methods.

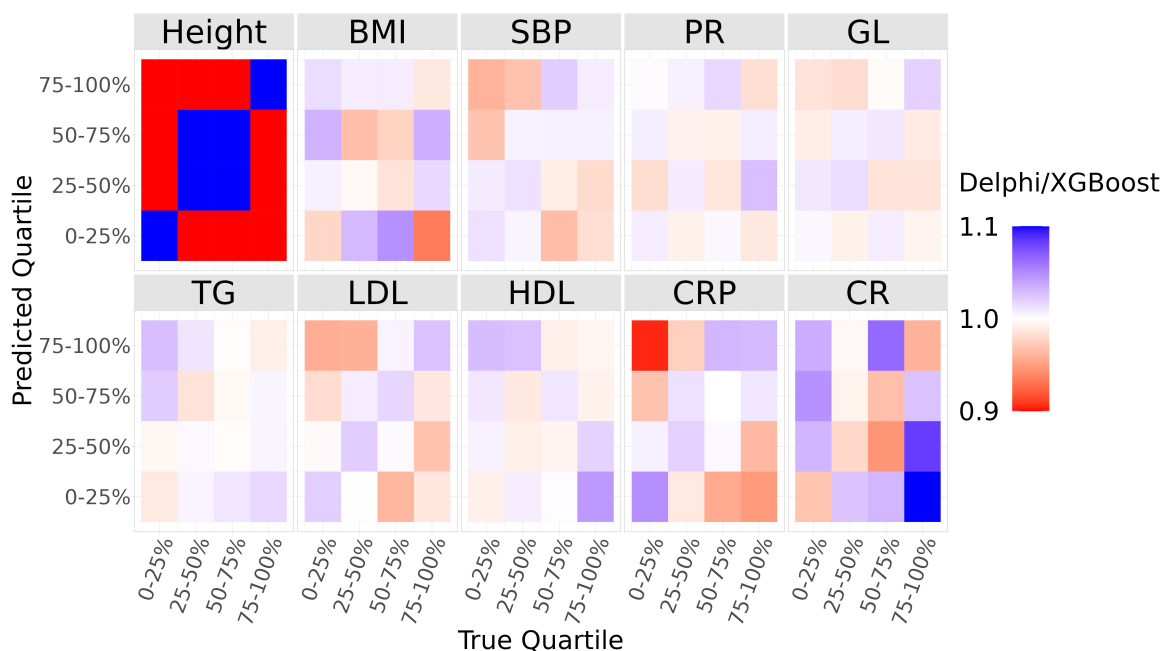

**Figure 4.** Ratio of quartile distributions of predictions between Delphi and XGBoost, on the test set for five phenotypes. Although the proportion of correctly binned subjects (same predicted and ground-truth quartiles) is similar for both methods, Delphi tends to avoid extreme differences between prediction and ground-truth. Values for height were bounded between 0.9 and 1.1 for visibility; original values are in the range of 0.2 and 1.3

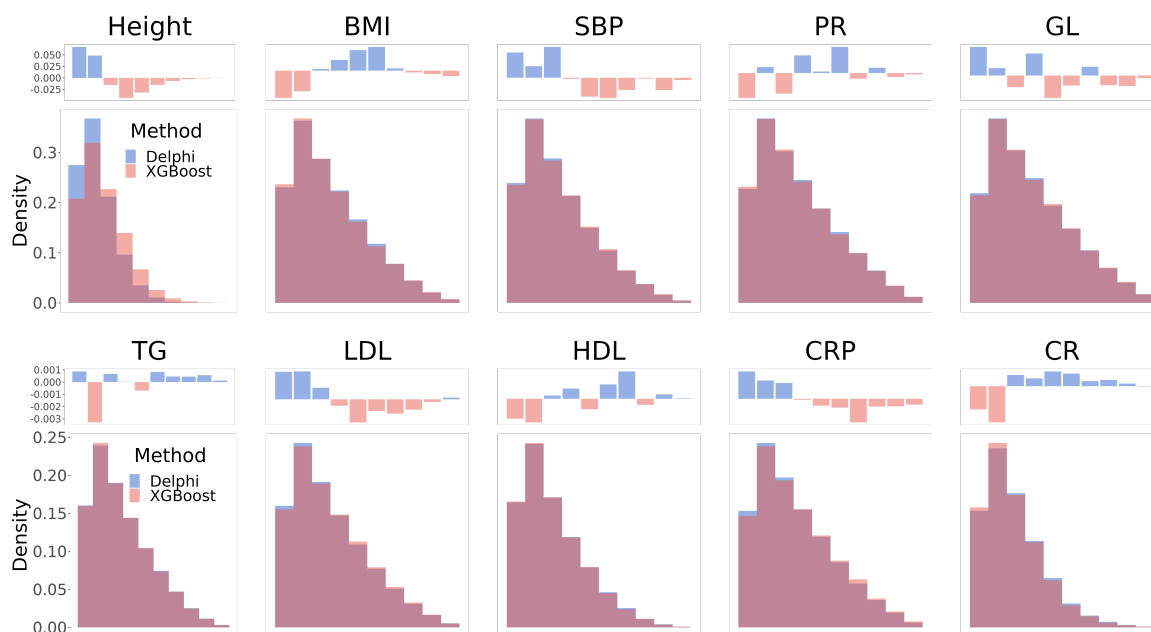

**Figure 5.** Histogram of the absolute difference between predicted and true deciles on the test set for five phenotypes. Delphi consistently bins subjects more adequately than XGBoost for most phenotypes.

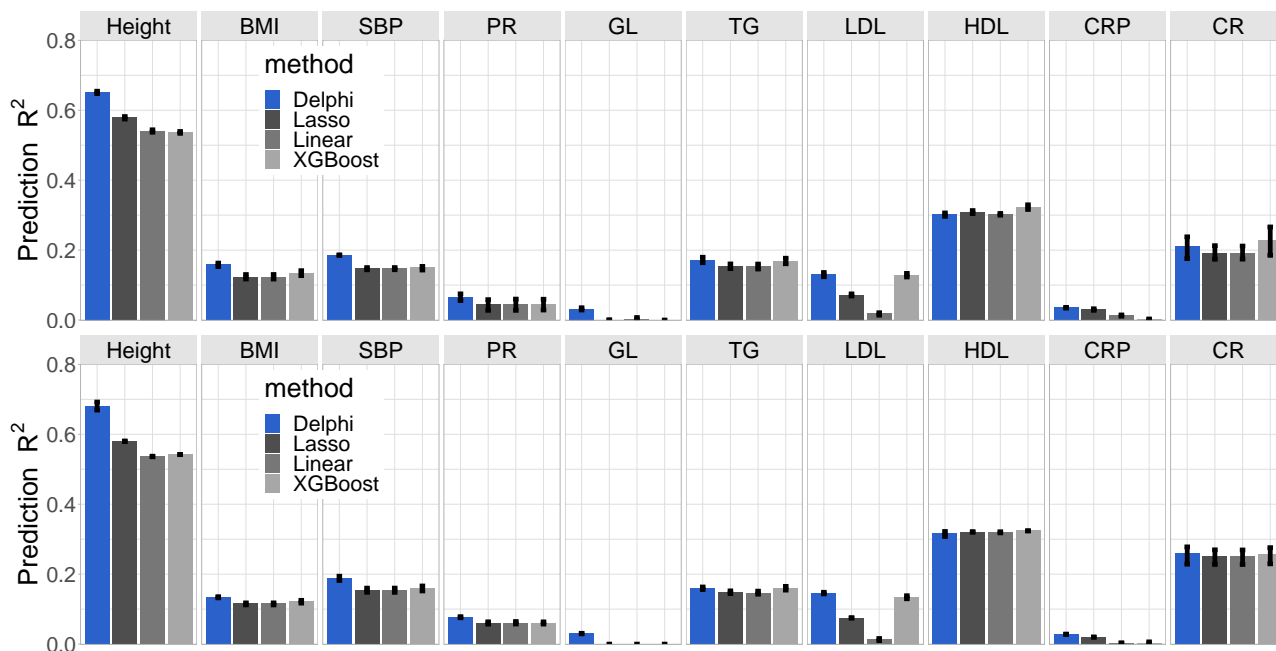

**Figure 6.** Accuracy of polygenic predictions for ten phenotypes in the UK Biobank. Top: predictions for ten phenotypes in the UK Biobank on individuals with non-British white ancestry. Bottom: Prediction results for individuals with British white ancestry. We report results for a linear PRS model, lasso regression, and XGBoost, including the dosage of multiple high-impact SNPs as input, and our method.

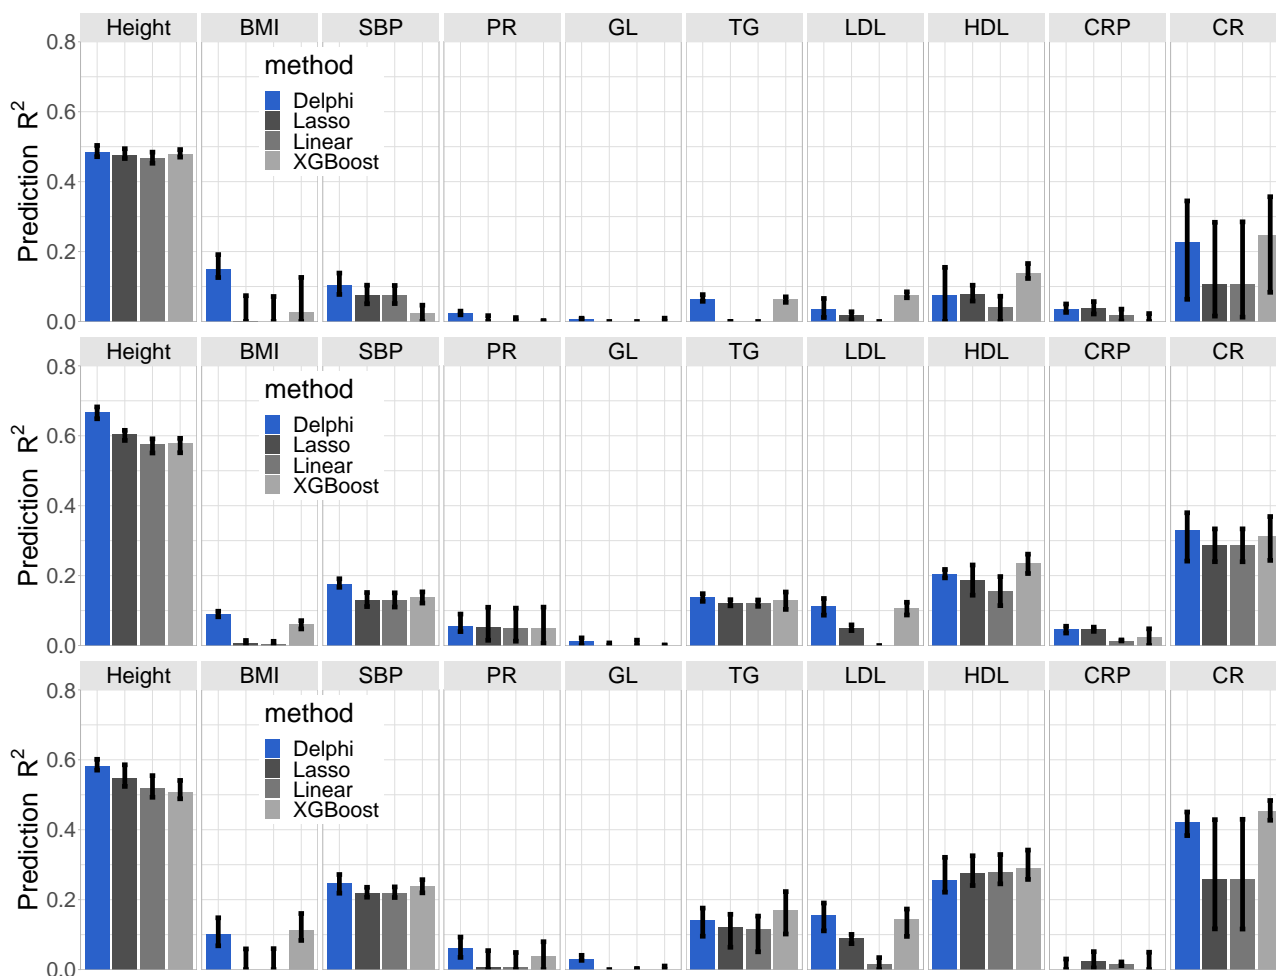

**Figure 7.** Accuracy of polygenic predictions for ten continuous phenotypes in the UK Biobank for three self-reported ethnicities. Top: African, middle: Indian, bottom: Chinese

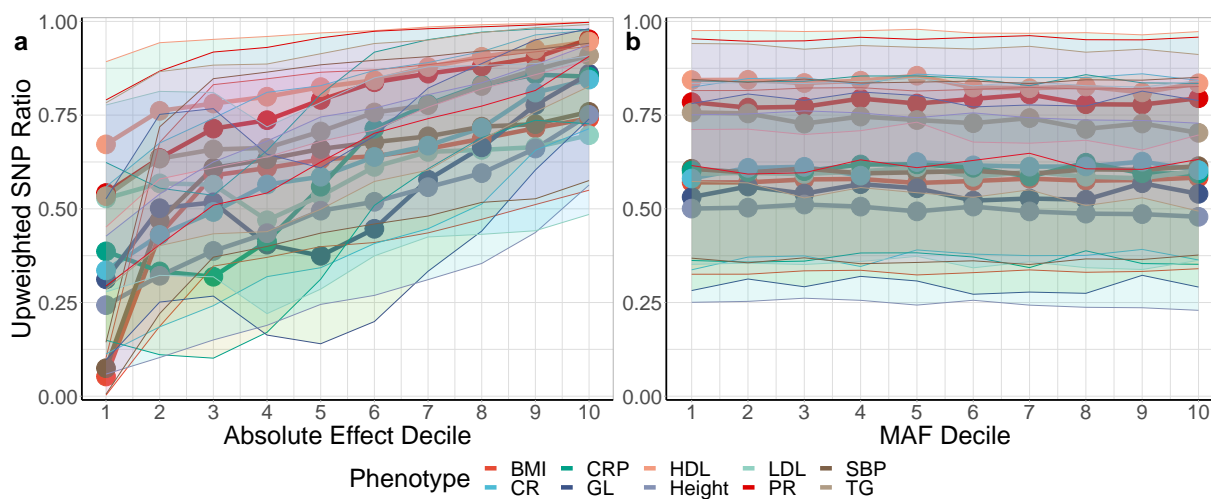

**Figure 8.** a) The ratio of up-weighted SNPs in Delphi by absolute effect size decile was estimated with LDpred for ten phenotypes. b) Ratio of up-weighted SNPs in Delphi by minor allele frequency.



## 147 Discussion

148 We introduced Delphi, a deep-learning-based method for trait prediction from genetic data. We demonstrated that deep  
149 learning enhances the predictive power of polygenic risk scores. Treating genetic risk estimation as a deep prediction  
150 problem allowed us to relax the usual assumptions of traditional PRS methods, yielding significant performance  
151 improvements on multiple phenotypes over previous PRS computation methods.

152 Several studies have tested deep learning approaches for phenotype inference from genetic data. These approaches  
153 all have a similar structure: use GWAS summary statistics to select a subset of SNPs, then use these as input for the  
154 neural network. Uppu et al. (25) used a 3-layer feed-forward network applied to breast cancer data. To our knowledge,  
155 this study contains the first use of a neural network for genetic risk prediction. In contrast, Bellot et al. (26) did not  
156 find any performance gain when comparing convolutional and fully connected neural networks to traditional methods.  
157 Recently, Huang et al. proposed DL-PRS (27), a method that also uses a shallow network to predict COPD, achieving  
158 marginal performance gains over traditional methods on UKBiobank data. A similar approach has been used by Badre  
159 et al. (28) with a 4-layer FC neural network on breast cancer data. Very recently, Zhou et al. (30) used a graph neural  
160 network for Alzheimer's prediction by constructing a graph from a few correlated loci. Elgart et al. (17) showed the  
161 strongest evidence for the superiority of non-linear methods for PRS by using gradient-boosted trees. This publication  
162 obtained robust results across multiple traits, which motivated our study.

163 All previously mentioned approaches only consider a small subset of SNPs (typically less than 1000) as input and  
164 become less predictive when including more small-effect SNPs. Training becomes difficult as smaller effects add  
165 noise to the input due to their minimal individual impact on the phenotype and a lack of clearly exploitable patterns.  
166 This is particularly a problem for PRS, which can include tens of thousands of SNPs. To guide the neural network  
167 towards meaningful predictions, we chose to perturb the estimated effect sizes rather than predicting the phenotype  
168 directly. As a result, we can effectively integrate up to a hundred thousand SNPs as input, which would not be feasible  
169 with other methods.

170 We have also shown that our method generalizes well when evaluated on individuals from non-European ancestries,  
171 although our training set is composed of 95 % European. This is an essential point for the success of PRS in any  
172 clinical setting, or their application can potentially reinforce racial bias (36). Our approach could be combined with  
173 other methods for the standardization of PRS, for instance, by combining summary statistics from multiple GWAS  
174 studies (37) or through some debiasing measure (38). The performance and fairness of PRS is an ongoing problem  
175 and requires more data acquisition from non-European cohorts. To reduce these disparities, it is necessary to  
176 thoroughly assess and maintain prediction performance for all populations.

177 Our study presents several limitations. The high dimensionality of the data, combined with the sizeable but still limited  
178 number of samples, means some trade-offs had to be taken to maintain consistent prediction performance across all  
179 traits. Similarly to other PRS methods, the most crucial hyperparameter to tune is the minimum threshold probability  
180 for SNP inclusion. This threshold also affects the number of SNPs we batch in a single embedding vector, and training  
181 can diverge when including too many non-significant SNPs. The  $> 1\%$  in MAF also limits our ability to generalize to  
182 other ethnicities but is required for GWAS. Similarly, we removed individuals from non-European ancestry for GWAS  
183 to avoid spurious associations but kept them during training.

184 Delphi tends to increase the effect of SNPs with high effect estimates and down-weights low effect SNPs. Similar  
185 heuristics have been shown to improve heritability estimates by tuning effects based on minor allele frequency (MAF)  
186 (10). Although MAF is correlated with effect size, we found no such association by inspecting variations modulation  
187 and MAF quantiles. Unfortunately, we also found that the effect estimates of individual SNPs would vary drastically  
188 between different data splits, making the interpretation of SNP effect modulation challenging, as the variations of the  
189 neural network were much smaller than the differences from data randomization. This limitation might be alleviated by  
190 including summary statistics from another cohort.

## 191 **Methods**

### 192 **UK Biobank**

193 The UK Biobank (UKBB) (31) is a large-scale ongoing prospective study including over half a million individuals  
194 from across the United Kingdom. Participants were first recruited between 2006 and 2010 and underwent extensive  
195 testing, including blood biomarkers, health and lifestyle questionnaires, and genotyping. Longitudinal hospitalization  
196 data for any disease represented by an ICD-10 code is also provided between the recruitment date and the present  
197 time. UKBB contains genotypes for 488,377 individuals at the time of download (March 2023), 409,519 of which are  
198 from 'white British' ancestry. Ancestry was inferred using the data field 22006, which uses self-reports and principal  
199 component analysis of the genotypes. Variant quality control included the removal of SNPs with imputation info  
200 score  $< 0.8$  and retaining SNPs with hard-call genotypes of  $> 0.9$  probability and  $MAF > 0.01$ . To reduce the initial  
201 dimensionality of the data, we only considered 1,054,330 HapMap3 (HM3) (39) SNPs as they have shown to be a  
202 sufficient set for traditional PRS methods (40) and are the standard set for polygenic risk score evaluation.

### 203 **Data Splits and Phenotypes**

204 We evaluated the performance on all ten traits of our method using three independent train/validation/test splits. For  
205 the quality control of our samples, we only considered 407,008 subjects used in the principal components analysis of  
206 the UKB dataset (field 22020). These subjects are unrelated, did not withdraw consent from the study, and passed  
207 some genotyping quality control tests. Subjects were not selected based on ancestry at this stage. We used 80%  
208 (325,606) of the dataset for training, 5000 subjects for validation, and the rest (76,402 subjects) for testing. Some  
209 individuals were further removed depending on missing data for each phenotype. We kept this exact split for the  
210 preprocessing and the training of the neural network. The same training set was used to compute the GWAS and  
211 train the neural network. The validation set was used to select the best hyperparameters for polygenic risk scores and  
212 benchmark algorithms and to stop the deep neural network training. We assessed the performance of our method on  
213 ten continuous phenotypes. BMI, height, SBP, LDL, and C reactive protein values were taken directly from the UK  
214 Biobank first time point measurements.

215 The LD reference panel used for LDpred was previously computed (40) with some individuals from the test set. The  
216 choice of LD reference panel was shown to have a limited impact on performance (40), and the same weights from  
217 LDpred were used for all benchmarked methods. Finally, this panel did not contain individuals from non-British white  
218 ancestry, ensuring that performance results on non-British white (see section [Performance comparison on non-white  
219 British for multiple phenotypes](#)) are unbiased.

### 220 **PCA and GWAS**

221 PCA eigenvectors were obtained from HM3 SNPs using only genotype information from the training set for each  
222 data split. As recommended (41), we used a truncated PCA method with initial pruning that iteratively removes  
223 long-range LD regions. For GWAS computation, the training set was pruned by removing individuals with no British  
224 white ancestry (field 22006) and who were beyond two standard deviations of the Mahalanobis distance of the first 6  
225 PCs. This additional subject selection was only applied for the GWAS to prevent spurious relationships that can arise  
226 with heterogeneous cohorts. Covariates for the regression included age, sex, the first 20 principal components,  $age^2$ ,  
227  $age \cdot sex$  and  $age^2 \cdot sex$ . PCA and GWAS were computed using the bigsnpr (34) R package (version 1.9.10).

### 228 **PRS Computation**

229 Polygenic risk scores were computed for each phenotype and data split using clumping and thresholding (C+T),  
230 lassosum2, and LDpred2. In C+T, correlated variants are first clumped together, leaving only the ones with the lowest  
231 P-values while others are removed. We used 50 P-value thresholds combined with stacking to learn an optimal linear  
232 combination of C+T scores in a 10-fold cross-validation on the train set. The remaining variants are then pruned by  
233 discarding the ones with a P-value larger than a chosen significance level. Lassosum uses L1 and L2 regularization on  
234 the effect sizes and a linkage disequilibrium (LD) correlation matrix to penalize correlated and low-effect variants. The  
235 regularization coefficients were chosen by measuring model performance on the validation set. LDpred is a Bayesian  
236 method that uses a prior on effect sizes and an LD correlation matrix to re-weight effect estimates. LDpred2-auto  
237 (42) is a variant of LDpred in which two key model parameters, the SNP heritability and polygenicity, are estimated  
238 from the data. The LD correlation matrix was obtained from a reference panel (40). We used the validation set to  
239 identify optimal hyper-parameters such as P-value cutoffs and regularization coefficients for each method. We used  
240 the C+T, Lassosum2, and LDpred2 implementations of the bigsnpr (34) R package (version 1.9.10), using the default  
241 hyperparameters ranges for each PRS method.

## 242 Network Architecture

243 We designed a deep learning neural network (DNN) to predict phenotypes from genetic data, illustrated in Figure 9.  
 244 During training, SNPs are loaded in memory as a matrix of size  $B \times S$ , where  $B$  represents the batch size and  $S$  is the  
 245 number of SNPs. To reduce the dimensionality of the data, SNPs were filtered by a tunable p-value threshold  $T$ . The  
 246 neural network's architecture is an 8-layer pre-norm transformer (43) with two attention heads and GELU activation  
 247 function (44). Similarly to vision transformers (43), we batched SNPs into arbitrary patches of length  $L$  to form a  
 248 sequence of embeddings, using zero-padding to complete the last embedding. Inputs were then linearly mapped to  
 249 match the input size of the transformer (512 in all experiments), and a vector containing covariate information was  
 250 added as the first embedding of the sequence.

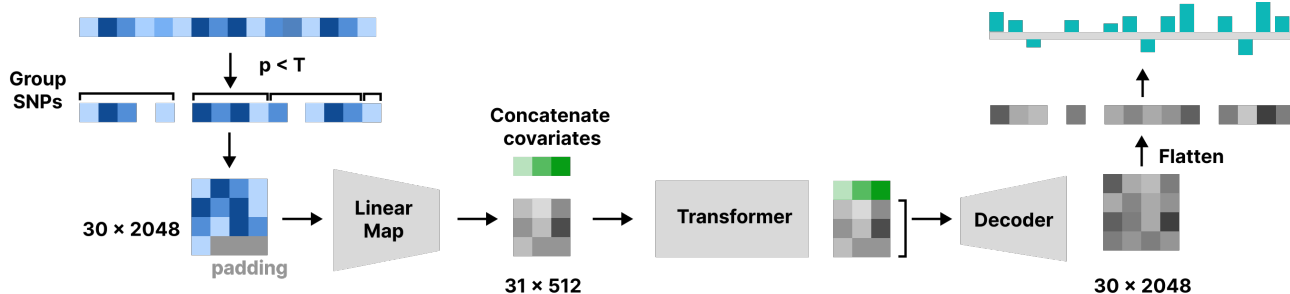

Figure 9. Overview of the architecture of the neural network.

251 We found that training directly on the phenotype would result in divergent training due to the large dimensionality  
 252 of the data, the low impact of individual SNPs, and the fact that phenotypes are not fully described by their inputs.  
 253 To remedy this problem, we used the effect sizes  $\beta_i$  from a classical PRS method to guide the neural network's  
 254 predictions. We decoded the output of the transformer using a linear layer to match the original input size and predict  
 255 variations of each effect using a  $\tanh$  activation function:

$$\beta'_i = \left(1 + \frac{1}{2} \tanh(f_{\theta}^i(x))\right) \beta_i, \quad (1)$$

256 where  $\beta_i$  is the effect size from the PRS,  $\beta'_i$  is the effect modified by the neural network  $f_{\theta}^i$ , and  $x$  is the input to the  
 257 neural network (covariates + 100K SNPs).

258 Each output  $\beta'_i$  represents an individual modification of the estimated effect that depends on covariates and the  
 259 presence of other SNPs. Modified effect estimates were then summed up to form the modified PRS prediction of the  
 260 DNN,  $y_{DNN} = \sum \beta'_i$ . We designed the DNN such that, were it to output only zeros, we would recover the unmodified  
 261 PRS score. We found that using the effect estimates as a guide during training to be the only way for the neural  
 262 network to output predictive results.

263 We used the effect sizes from LDpred2 to train the neural network in all our experiments. We used a batch size  
 264 of  $B = 512$ , transformer input size of 512, feed-forward dimension of 512, and 0.3 dropout during training. The  
 265 covariate vector included the same covariates from the GWAS for each trait. The patch size ( $L \in \{128, 2048\}$ ), P-value  
 266 thresholds (range  $0.01 \cdot 10^{-6}$ ), and learning rate (range  $0.05 \cdot 5 \cdot 10^{-4}$ ) were individually tuned for each trait and were  
 267 the only parameters that varied between traits. For a specific trait, we used the same patch size and p-value threshold  
 268 for each data split. We used a linear decay for the learning rate with 300 warmup steps. Models were trained on a  
 269 single NVIDIA GeForce RTX 3090 (24 GB) and were composed of approximately 14M parameters. We used the  
 270 AdamW optimizer (45) with  $\epsilon = 10 \cdot 10^{-8}$ ,  $\beta = (0.9, 0.999)$ . Training averaged between 4 to 8 hours for each trait.

271 For binary traits, we used the ROC AUC as the evaluation metric.

272 For all phenotypes, we used explained variance (Equation 2) as the evaluation metric:

$$\text{EVR} = 1 - \frac{\text{var}(y - \hat{y})}{\text{var}(y)}, \quad (2)$$

273 where  $y$  is the ground truth and  $\hat{y}$  is the prediction.

274 We used these metrics to select the best-performing model on the validation set and for the final evaluation of the  
 275 held-out test set. We used smooth L1 loss (46) during training.

276 Interestingly, we observed different convergence patterns for each phenotype. Some, like BMI and SBP, tended to  
 277 converge after one epoch despite a very low learning rate and even overfit after this point. On the other hand, height  
 278 required a much larger learning rate and converged after around 20 epochs. Binary traits included fewer SNPs due to  
 279 differences in the distribution of GWAS p-values. Consequently, binary traits required a smaller patch size. We tuned  
 280 the patch size such that the sequence length lay between 20 and 70, keeping patch sizes multiples of 2 between 256  
 281 and 2048.

## 282 Covariate Model

283 As some covariates can greatly impact the phenotype (e.g., sex and height), we found that directly using the phenotype  
284 as a ground truth would make the neural network diverge during training for some phenotypes. To solve this problem,  
285 we used another model that only used the covariates as input to predict the phenotype and trained the deep neural  
286 network on the residuals. We chose XGBoost, a gradient-boosted trees method similar to the method we used to  
287 benchmark, without the additional high-impact SNPs. To be consistent, we used the same hyperparameters across  
288 data splits and phenotypes with 3-fold cross-validation for optimal model selection. For the XGBoost hyperparameters,  
289 we used a maximum depth of 5,  $\alpha = 0, \gamma = 0, \eta = 0.01$ , a subsample of 80%, and a minimum child weight of 10 in all  
290 our experiments. The weighted sum of effect estimates with P-values lower than 0.05 but higher than the P-value  
291 threshold of the deep neural network was then added back to the output of the covariate model. Finally, The DNN  
292 predictions  $y_{DNN}$  were linearly combined with the covariate model to form the final prediction.

## 293 Data Loading During Training

294 Gene sequence variations formats such as bgen and pgen are compressed and optimized to query a single variant at  
295 a time to enable fast GWAS analysis. For our purposes, we needed a format that could allow us to efficiently load  
296 in memory all HM3 variants for a small number of subjects. We chose to convert the HM3 SNPs in bgen format to  
297 a Hierarchical Data Format (HDF5) with a Python script using the h5py (47) and bgen\_reader (48) libraries. When  
298 loading the data, we implemented an efficient dataloader that merges genotype and phenotype information. This data  
299 format allowed us to load a batch of 512 samples containing 1.1M SNPs in memory in less than 10 ms, which was  
300 acceptable for training. Bgens were converted to a single HDF file with a Python script, which only needed to be done  
301 once. We encoded allele dosage as 0, 1, and 2 for homozygous reference, heterozygous, and homozygous allele.  
302 The samples were ordered as in the sample file from the .bgen of the first chromosome.

## 303 Adding in low effects as constants

304 To keep the inputs' dimensionality relatively low and avoid including extremely small effects, we summed up the effects  
305 that were lower than 0.05% of the maximum and only included the others in the input of the neural network. The sum  
306 of the smaller effects was then added to the  $y_{DNN}$  output. Assuming that the deep neural network output only zeros,  
307 the network's architecture is such that output would be the same as the LDpred weighted sum.

## 308 Model performance evaluation and comparison to existing methods

309 We compared the performance of our approach to three other state-of-the-art methods. We used the polygenic risk  
310 score predictions from LDpred2 for each method and included the same covariates as our approach. It was recently  
311 found (17) that including high-impact SNPs in a non-linear model can increase the quality of genetic prediction. We  
312 modified this existing method to be computationally feasible while enabling fair comparison. To be precise, instead  
313 of filtering SNPs with LASSO regression before XGboost, which we found to be computationally expensive due to  
314 the size of UKB, we filtered them by P-value thresholding. We considered for inclusion in the model all SNPs with  
315 a  $p$  value  $< 10^{-4}$  using our GWAS summary statistics for the corresponding trait, keeping the same data splits as  
316 previously described. We then used eight relative thresholds  $\alpha$  values between 0 and 1 and kept SNPs with a P-value  
317 in the top  $T$  percentile.

318 We fitted XGBoost and LASSO models by including covariates (sex, age, first 20 PCs), selected SNPs, and the  
319 LDpred2 risk score prediction. We selected the model that minimized the MSE for each phenotype. For XGBoost, we  
320 always used a learning rate of 0.01, maximum depth of 5, minimum child weight of 10, and subsample of 80%. Each  
321 model was fit using 3-fold cross-validation on the training set, allowing up to 2000 boosted trees with early stopping  
322 after 20 rounds. We repeated this process for all 10 traits and 3 data splits. Analysis was conducted using Python 3  
323 and the scikit-learn and xgboost packages.

## 324 Data Analysis with R

325 Data analysis was performed with publicly available packages: tidyverse v1.3.1 (49), and dplyr v1.0.8 (50).

## 326 Data Analysis with Python

327 The covariate model was implemented using the xgboost python library (51). The deep learning model was  
328 implemented in Pytorch (52).

329 **Code Availability**

330 Code used for processing genetic data, GWAS analyses, and training of the neural network for this manuscript is  
331 provided on a dedicated GitLab repository <https://gitlab.com/CGeorgantasCHUV/delphi>.

332 **Data availability**

333 No data were generated in the present study. UK Biobank data are publicly available by application (<https://www.ukbiobank.ac.uk/enable-your-research/register>).  
334

335 **Acknowledgements**

336 This research has been conducted using the UK Biobank resource under application number 80108, with funding  
337 from the Swiss National Science Foundation (Sinergia CRSII5\_202276/1).

## Bibliography

- 339 1. Teri A. Manolio, Francis S. Collins, Nancy J. Cox, David B. Goldstein, Lucia A. Hindorf, David J. Hunter, Mark I. McCarthy,  
340 Erin M. Ramos, Lon R. Cardon, Aravinda Chakravarti, Judy H. Cho, Alan E. Guttmacher, Augustine Kong, Leonid Kruglyak,  
341 Elaine Mardis, Charles N. Rotimi, Montgomery Slatkin, David Valle, Alice S. Whittemore, Michael Boehnke, Andrew G. Clark,  
342 Evan E. Eichler, Greg Gibson, Jonathan L. Haines, Trudy F. C. Mackay, Steven A. McC Carroll, and Peter M. Visscher. Finding  
343 the missing heritability of complex diseases. *Nature*, 461(7265):747–753, October 2009.
- 344 2. Michael D. Osterman, Tyler G. Kinzy, and Jessica N. Cooke Bailey. Polygenic Risk Scores. *Current Protocols*, 1(5):e126, May  
345 2021.
- 346 3. Ali Torkamani, Nathan E. Wineinger, and Eric J. Topol. The personal and clinical utility of polygenic risk scores. *Nature*  
347 *Reviews Genetics*, 19(9):581–590, September 2018.
- 348 4. Cathryn M. Lewis and Evangelos Vassos. Polygenic risk scores: from research tools to clinical instruments. *Genome*  
349 *Medicine*, 12(1):44, May 2020.
- 350 5. Jack W. O'Sullivan, Anna Shcherbina, Johanne M. Justesen, Mintu Turakhia, Marco Perez, Hannah Wand, Catherine  
351 Tcheandjieu, Shoa L. Clarke, Manuel A. Rivas, and Euan A. Ashley. Combining Clinical and Polygenic Risk Improves Stroke  
352 Prediction Among Individuals With Atrial Fibrillation. *Circulation. Genomic and Precision Medicine*, 14(3):e003168, June  
353 2021.
- 354 6. David M. Evans, Peter M. Visscher, and Naomi R. Wray. Harnessing the information contained within genome-wide association  
355 studies to improve individual prediction of complex disease risk. *Human Molecular Genetics*, 18(18):3525–3531, September  
356 2009.
- 357 7. Shaun M. Purcell, Naomi R. Wray, Jennifer L. Stone, Peter M. Visscher, Michael C. O'Donovan, Patrick F. Sullivan, Pamela  
358 Sklar, Shaun M. Purcell (Leader), Jennifer L. Stone, Patrick F. Sullivan, Douglas M. Ruderfer, Andrew McQuillin, Derek W.  
359 Morris, Colm T. O'Dushlaine, Aiden Corvin, Peter A. Holmans, Michael C. O'Donovan, Pamela Sklar, Naomi R. Wray, Stuart  
360 Macgregor, Pamela Sklar, Patrick F. Sullivan, Michael C. O'Donovan, Peter M. Visscher, Hugh Gurling, Douglas H. R.  
361 Blackwood, Aiden Corvin, Nick J. Craddock, Michael Gill, Christina M. Hultman, George K. Kirov, Paul Lichtenstein, Andrew  
362 McQuillin, Walter J. Muir, Michael C. O'Donovan, Michael J. Owen, Carlos N. Pato, Shaun M. Purcell, Edward M. Scolnick,  
363 David St Clair, Jennifer L. Stone, Patrick F. Sullivan, Pamela Sklar (Leader), Michael C. O'Donovan, George K. Kirov, Nick J.  
364 Craddock, Peter A. Holmans, Nigel M. Williams, Lyudmila Georgieva, Ivan Nikolov, N. Norton, H. Williams, Draga Toncheva,  
365 Vihra Milanova, Michael J. Owen, Christina M. Hultman, Paul Lichtenstein, Emma F. Thelander, Patrick Sullivan, Derek W.  
366 Morris, Colm T. O'Dushlaine, Elaine Kenny, Emma M. Quinn, Michael Gill, Aiden Corvin, Andrew McQuillin, Khalid Choudhury,  
367 Susmita Datta, Jonathan Pimm, Srinivasa Thirumalai, Vinay Puri, Robert Krasucki, Jacob Lawrence, Digby Quedest, Nicholas  
368 Bass, Hugh Gurling, Caroline Crombie, Gillian Fraser, Soh Leh Kuan, Nicholas Walker, David St Clair, Douglas H. R.  
369 Blackwood, Walter J. Muir, Kevin A. McGhee, Ben Pickard, Pat Malloy, Alan W. Maclean, Margaret Van Beck, Naomi R. Wray,  
370 Stuart Macgregor, Peter M. Visscher, Michele T. Pato, Helena Medeiros, Frank Middleton, Celia Carvalho, Christopher Morley,  
371 Ayman Fanous, David Conti, James A. Knowles, Carlos Paz Ferreira, Antonio Macedo, M. Helena Azevedo, Carlos N. Pato,  
372 Jennifer L. Stone, Douglas M. Ruderfer, Andrew N. Kirby, Manuel A. R. Ferreira, Mark J. Daly, Shaun M. Purcell, Pamela Sklar,  
373 Shaun M. Purcell, Jennifer L. Stone, Kimberly Chambert, Douglas M. Ruderfer, Finny Kuruvilla, Stacey B. Gabriel, Kristin  
374 Ardlie, Jennifer L. Moran, Mark J. Daly, Edward M. Scolnick, Pamela Sklar, The International Schizophrenia Consortium,  
375 Manuscript preparation, Data analysis, GWAS analysis subgroup, Polygene analyses subgroup, Management committee,  
376 Cardiff University, Karolinska Institutet/University of North Carolina at Chapel Hill, Trinity College Dublin, University College  
377 London, University of Aberdeen, University of Edinburgh, Queensland Institute of Medical Research, University of Southern  
378 California, Massachusetts General Hospital, and Stanley Center for Psychiatric Research and Broad Institute of MIT and  
379 Harvard. Common polygenic variation contributes to risk of schizophrenia and bipolar disorder. *Nature*, 460(7256):748–752,  
380 August 2009.
- 381 8. Bjarni J. Vilhjálmsson, Jian Yang, Hilary K. Finucane, Alexander Gusev, Sara Lindström, Stephan Ripke, Giulio Genovese,  
382 Po-Ru Loh, Gaurav Bhatia, Ron Do, Tristan Hayeck, Hong-Hee Won, Sekar Kathiresan, Michele Pato, Carlos Pato, Rulla  
383 Tamimi, Eli Stahl, Noah Zaitlen, Bogdan Pasaniuc, Gillian Belbin, Eimear E. Kenny, Mikkel H. Schierup, Philip De Jager,  
384 Nikolaos A. Patsopoulos, Steve McC Carroll, Mark Daly, Shaun Purcell, Daniel Chasman, Benjamin Neale, Michael Goddard,  
385 Peter M. Visscher, Peter Kraft, Nick Patterson, and Alkes L. Price. Modeling Linkage Disequilibrium Increases Accuracy of  
386 Polygenic Risk Scores. *American Journal of Human Genetics*, 97(4):576–592, October 2015.
- 387 9. Timothy Shin Heng Mak, Robert Milan Porsch, Shing Wan Choi, Xueya Zhou, and Pak Chung Sham. Polygenic scores via  
388 penalized regression on summary statistics: MAK et al. *Genetic Epidemiology*, 41(6):469–480, September 2017.
- 389 10. Doug Speed, Na Cai, UCLEB Consortium, Michael R. Johnson, Sergey Nejentsev, and David J. Balding. Reevaluation of  
390 SNP heritability in complex human traits. *Nature Genetics*, 49(7):986–992, July 2017.
- 391 11. Carla Márquez-Luna, Steven Gazal, Po-Ru Loh, Samuel S. Kim, Nicholas Furlotte, Adam Auton, and Alkes L. Price.  
392 Incorporating functional priors improves polygenic prediction accuracy in UK Biobank and 23andMe data sets. *Nature*  
393 *Communications*, 12(1):6052, October 2021.
- 394 12. L. Duncan, H. Shen, B. Gelaye, J. Meijssen, K. Ressler, M. Feldman, R. Peterson, and B. Domingue. Analysis of polygenic risk  
395 score usage and performance in diverse human populations. *Nature Communications*, 10(1):3328, July 2019.
- 396 13. Alicia R. Martin, Masahiro Kanai, Yoichiro Kamatani, Yukinori Okada, Benjamin M. Neale, and Mark J. Daly. Clinical use of  
397 current polygenic risk scores may exacerbate health disparities. *Nature Genetics*, 51(4):584–591, April 2019.
- 398 14. Carla Márquez-Luna, Po-Ru Loh, South Asian Type 2 Diabetes (SAT2D) Consortium, SIGMA Type 2 Diabetes Consortium,  
399 and Alkes L. Price. Multiethnic polygenic risk scores improve risk prediction in diverse populations. *Genetic Epidemiology*,  
400 41(8):811–823, December 2017.
- 401 15. Yunfeng Ruan, Yen-Feng Lin, Yen-Chen Anne Feng, Chia-Yen Chen, Max Lam, Zhenglin Guo, Lin He, Akira Sawa, Alicia R.  
402 Martin, Shengying Qin, Hailiang Huang, and Tian Ge. Improving polygenic prediction in ancestrally diverse populations.  
403 *Nature Genetics*, 54(5):573–580, May 2022.
- 404 16. Tiffany Amariuta, Kazuyoshi Ishigaki, Hiroki Sugishita, Tazro Ohta, Masaru Koido, Kushal K. Dey, Koichi Matsuda, Yoshinori  
405 Murakami, Alkes L. Price, Eiryo Kawakami, Chikashi Terao, and Soumya Raychaudhuri. Improving the trans-ancestry  
406 portability of polygenic risk scores by prioritizing variants in predicted cell-type-specific regulatory elements. *Nature Genetics*,

- 52(12):1346–1354, December 2020.
- 407  
408 17. Michael Elgart, Genevieve Lyons, Santiago Romero-Brufau, Nuzulul Kurniansyah, Jennifer A. Brody, Xiuqing Guo, Henry J.  
409 Lin, Laura Raffield, Yan Gao, Han Chen, Paul de Vries, Donald M. Lloyd-Jones, Leslie A. Lange, Gina M. Peloso, Myriam  
410 Fornage, Jerome I. Rotter, Stephen S. Rich, Alanna C. Morrison, Bruce M. Psaty, Daniel Levy, Susan Redline, Paul de Vries,  
411 and Tamar Sofer. Non-linear machine learning models incorporating SNPs and PRS improve polygenic prediction in diverse  
412 human populations. *Communications Biology*, 5(1):1–12, August 2022.
- 413 18. Ryan Poplin, Pi-Chuan Chang, David Alexander, Scott Schwartz, Thomas Colthurst, Alexander Ku, Dan Newburger, Jojo  
414 Dijamco, Nam Nguyen, Pegah T. Afshar, Sam S. Gross, Lizzie Dorfman, Cory Y. McLean, and Mark A. DePristo. A universal  
415 SNP and small-indel variant caller using deep neural networks. *Nature Biotechnology*, 36(10):983–987, November 2018.
- 416 19. Avanti Shrikumar, Katherine Tian, Žiga Avsec, Anna Shcherbina, Abhimanyu Banerjee, Mahfuza Sharmin, Surag Nair, and  
417 Anshul Kundaje. Technical Note on Transcription Factor Motif Discovery from Importance Scores (TF-MoDISco) version  
418 0.5.6.5, April 2020. arXiv:1811.00416 [cs, q-bio, stat].
- 419 20. Matthias Kirchler, Stefan Konigorski, Matthias Norden, Christian Meltendorf, Marius Kloft, Claudia Schurmann, and Christoph  
420 Lippert. transferGWAS: GWAS of images using deep transfer learning. *Bioinformatics (Oxford, England)*, 38(14):3621–3628,  
421 July 2022.
- 422 21. Upamanyu Ghose, William Sproviero, Laura Winchester, Marco Fernandes, Danielle Newby, Brittany Ulm, Liu Shi, Qiang Liu,  
423 Cassandra Adams, Ashwag Albukhari, Majid Almansouri, Hani Choudhry, Cornelia van Duijn, and Alejo Nevado-Holgado.  
424 Genome wide association neural networks (GWANN) identify novel genes linked to family history of Alzheimer's disease in  
425 the UK Biobank, June 2022.
- 426 22. Arno van Hilten, Steven A. Kushner, Manfred Kayser, M. Arfan Ikram, Hieab H. H. Adams, Caroline C. W. Klaver, Wiro J.  
427 Niessen, and Gennady V. Roshchupkin. GenNet framework: interpretable deep learning for predicting phenotypes from  
428 genetic data. *Communications Biology*, 4(1):1–9, September 2021.
- 429 23. Shuya Abe, Shinichiro Tago, Kazuaki Yokoyama, Miho Ogawa, Tomomi Takei, Seiya Imoto, and Masaru Fujii. Explainable AI  
430 for Estimating Pathogenicity of Genetic Variants Using Large-Scale Knowledge Graphs. *Cancers*, 15(4):1118, January 2023.
- 431 24. Nilesch Tripuraneni, Ben Adlam, and Jeffrey Pennington. Overparameterization Improves Robustness to Covariate Shift in High  
432 Dimensions. In *Advances in Neural Information Processing Systems*, volume 34, pages 13883–13897. Curran Associates,  
433 Inc., 2021.
- 434 25. Suneetha Uppu, Aneesh Krishna, and Raj Gopalan. TOWARDS DEEP LEARNING IN GENOME-WIDE ASSOCIATION  
435 INTERACTION STUDIES. *PACIS 2016 Proceedings*, June 2016.
- 436 26. Pau Bellot, Gustavo de Los Campos, and Miguel Pérez-Enciso. Can Deep Learning Improve Genomic Prediction of Complex  
437 Human Traits? *Genetics*, 210(3):809–819, November 2018.
- 438 27. Sijia Huang, Xiao Ji, Michael Cho, Jaehyun Joo, and Jason Moore. DL-PRS: a novel deep learning approach to polygenic risk  
439 score. Technical report, 2021. Type: article.
- 440 28. Adrien Badré, Li Zhang, Wellington Muchero, Justin C. Reynolds, and Chongle Pan. Deep neural network improves the  
441 estimation of polygenic risk scores for breast cancer. *Journal of Human Genetics*, 66(4):359–369, April 2021.
- 442 29. Nimrod Ashkenazy, Martin Feder, Ofer M. Shir, and Sarel Hübner. GWANN: Implementing deep learning in genome wide  
443 association studies, June 2022.
- 444 30. Xiaopu Zhou, Yu Chen, Fanny C. F. Ip, Yuanbing Jiang, Han Cao, Ge Lv, Huan Zhong, Jiahang Chen, Tao Ye, Yuewen Chen,  
445 Yulin Zhang, Shuangshuang Ma, Ronnie M. N. Lo, Estella P. S. Tong, Vincent C. T. Mok, Timothy C. Y. Kwok, Qihao Guo, Kin Y.  
446 Mok, Maryam Shoai, John Hardy, Lei Chen, Amy K. Y. Fu, and Nancy Y. Ip. Deep learning-based polygenic risk analysis for  
447 Alzheimer's disease prediction. *Communications Medicine*, 3(1):1–20, April 2023.
- 448 31. Cathie Sudlow, John Gallacher, Naomi Allen, Valerie Beral, Paul Burton, John Danesh, Paul Downey, Paul Elliott, Jane Green,  
449 Martin Landray, Bette Liu, Paul Matthews, Giok Ong, Jill Pell, Alan Silman, Alan Young, Tim Sprosen, Tim Peakman, and Rory  
450 Collins. UK Biobank: An Open Access Resource for Identifying the Causes of a Wide Range of Complex Diseases of Middle  
451 and Old Age. *PLoS Medicine*, 12(3):e1001779, March 2015.
- 452 32. Tianqi Chen and Carlos Guestrin. XGBoost: A Scalable Tree Boosting System. In *Proceedings of the 22nd ACM SIGKDD*  
453 *International Conference on Knowledge Discovery and Data Mining*, pages 785–794, San Francisco California USA, August  
454 2016. ACM.
- 455 33. A second generation human haplotype map of over 3.1 million SNPs. *Nature*, 449(7164):851–861, October 2007.
- 456 34. Analysis of Massive SNP Arrays.
- 457 35. Doug Speed, John Holmes, and David J. Balding. Evaluating and improving heritability models using summary statistics.  
458 *Nature Genetics*, 52(4):458–462, April 2020.
- 459 36. Adebowale Adeyemo, Mary K. Balaconis, Deanna R. Darnes, Segun Fatumo, Palmira Granados Moreno, Chani J. Hodonsky,  
460 Michael Inouye, Masahiro Kanai, Kazuto Kato, Bartha M. Knoppers, Anna C. F. Lewis, Alicia R. Martin, Mark I. McCarthy,  
461 Michelle N. Meyer, Yukinori Okada, J. Brent Richards, Lucas Richter, Samuli Ripatti, Charles N. Rotimi, Saskia C. Sanderson,  
462 Amy C. Sturm, Ricardo A. Verdugo, Elisabeth Widen, Cristen J. Willer, Genevieve L. Wojcik, Alicia Zhou, and Polygenic Risk  
463 Score Task Force of the International Common Disease Alliance. Responsible use of polygenic risk scores in the clinic:  
464 potential benefits, risks and gaps. *Nature Medicine*, 27(11):1876–1884, November 2021.
- 465 37. Omer Weissbrod, Masahiro Kanai, Huwenbo Shi, Steven Gazal, Wouter J. Peyrot, Amit V. Khera, Yukinori Okada, Alicia R.  
466 Martin, Hilary K. Finucane, and Alkes L. Price. Leveraging fine-mapping and multipopulation training data to improve  
467 cross-population polygenic risk scores. *Nature Genetics*, 54(4):450–458, April 2022.
- 468 38. Diego Machado Reyes, Aritra Bose, Ehud Karavani, and Laxmi Parida. FairPRS: adjusting for admixed populations in polygenic  
469 risk scores using invariant risk minimization. *Pacific Symposium on Biocomputing. Pacific Symposium on Biocomputing*,  
470 28:198–208, 2023.
- 471 39. David M. Altshuler, Richard A. Gibbs, Leena Peltonen, David M. Altshuler, Richard A. Gibbs, Leena Peltonen, Emmanouil  
472 Dermitzakis, Stephen F. Schaffner, Fuli Yu, Leena Peltonen, Emmanouil Dermitzakis, Penelope E. Bonnen, David M.  
473 Altshuler, Richard A. Gibbs, Paul I. W. de Bakker, Panos Deloukas, Stacey B. Gabriel, Rhian Gwilliam, Sarah Hunt, Michael  
474 Inouye, Xiaoming Jia, Aarno Palotie, Melissa Parkin, Pamela Whittaker, Fuli Yu, Kyle Chang, Alicia Hawes, Lora R. Lewis,  
475 Yanru Ren, David Wheeler, Richard A. Gibbs, Donna Marie Muzny, Chris Barnes, Katayoon Darvishi, Matthew Hurles,  
476 Joshua M. Korn, Kati Kristiansson, Charles Lee, Steven A. McCarroll, James Nemesh, Emmanouil Dermitzakis, Alon Keinan,

- 477 Stephen B. Montgomery, Samuela Pollack, Alkes L. Price, Nicole Soranzo, Penelope E. Bonnen, Richard A. Gibbs, Claudia  
478 Gonzaga-Jauregui, Alon Keinan, Alkes L. Price, Fuli Yu, Verneri Anttila, Wendy Brodeur, Mark J. Daly, Stephen Leslie, Gil  
479 McVean, Loukas Moutsianas, Huy Nguyen, Stephen F. Schaffner, Qingrun Zhang, Mohammed J. R. Ghorri, Ralph McGinnis,  
480 William McLaren, Samuela Pollack, Alkes L. Price, Stephen F. Schaffner, Fumihiko Takeuchi, Sharon R. Grossman, Ilya  
481 Shlyakhter, Elizabeth B. Hostetter, Pardis C. Sabeti, Clement A. Adebamowo, Morris W. Foster, Deborah R. Gordon, Julio  
482 Licinio, Maria Cristina Manca, Patricia A. Marshall, Ichiro Matsuda, Duncan Ngare, Vivian Ota Wang, Deepa Reddy, Charles N.  
483 Rotimi, Charmaine D. Royal, Richard R. Sharp, Changqing Zeng, Lisa D. Brooks, Jean E. McEwen, The International HapMap  
484 3 Consortium, Principal investigators, Project coordination leaders, Manuscript writing group, Genotyping and QC, ENCODE  
485 3 sequencing and SNP discovery, Copy number variation typing and analysis, Population analysis, Low frequency variation  
486 analysis, Linkage disequilibrium and haplotype sharing analysis, Imputation, Natural selection, Community engagement  
487 and sample collection groups, and Scientific management. Integrating common and rare genetic variation in diverse human  
488 populations. *Nature*, 467(7311):52–58, September 2010.
- 489 40. Florian Privé, Julyan Arbel, Hugues Aschard, and Bjarni J. Vilhjálmsson. Identifying and correcting for misspecifications in  
490 GWAS summary statistics and polygenic scores. *HGG advances*, 3(4):100136, October 2022.
- 491 41. Abdel Abdellaoui, Juke-Jan Hottenga, Peter de Knijff, Michel G. Nivard, Xiangjun Xiao, Paul Scheet, Andrew Brooks, Erik A.  
492 Ehli, Yueshan Hu, Gareth E. Davies, James J. Hudziak, Patrick F. Sullivan, Toos van Beijsterveldt, Gonke Willemsen, Eco J.  
493 de Geus, Brenda W. J. H. Penninx, and Dorret I. Boomsma. Population structure, migration, and diversifying selection in the  
494 Netherlands. *European Journal of Human Genetics*, 21(11):1277–1285, November 2013.
- 495 42. Florian Privé, Julyan Arbel, and Bjarni J. Vilhjálmsson. LDpred2: better, faster, stronger. *Bioinformatics (Oxford, England)*,  
496 36(22-23):5424–5431, April 2021.
- 497 43. Alexey Dosovitskiy, Lucas Beyer, Alexander Kolesnikov, Dirk Weissenborn, Xiaohua Zhai, Thomas Unterthiner, Mostafa  
498 Dehghani, Matthias Minderer, Georg Heigold, Sylvain Gelly, Jakob Uszkoreit, and Neil Houlsby. An Image is Worth 16x16  
499 Words: Transformers for Image Recognition at Scale, June 2021. arXiv:2010.11929 [cs].
- 500 44. Ruibin Xiong, Yunchang Yang, Di He, Kai Zheng, Shuxin Zheng, Chen Xing, Huishuai Zhang, Yanyan Lan, Liwei Wang, and  
501 Tie-Yan Liu. On Layer Normalization in the Transformer Architecture, June 2020. arXiv:2002.04745 [cs, stat].
- 502 45. Diederik P. Kingma and Jimmy Ba. Adam: A Method for Stochastic Optimization, January 2017. arXiv:1412.6980 [cs].
- 503 46. Ross Girshick. Fast R-CNN, September 2015. arXiv:1504.08083 [cs].
- 504 47. HDF5 for Python.
- 505 48. Bgen-reader's documentation — bgen-reader 4.0.8 documentation.
- 506 49. Hadley Wickham and RStudio. tidyverse: Easily Install and Load the 'Tidyverse', February 2023.
- 507 50. Hadley Wickham, Romain François, Lionel Henry, Kirill Müller, Davis Vaughan, Posit Software, and PBC. dplyr: A Grammar of  
508 Data Manipulation, November 2023.
- 509 51. xgboost: XGBoost Python Package.
- 510 52. Adam Paszke, Sam Gross, Francisco Massa, Adam Lerer, James Bradbury, Gregory Chanan, Trevor Killeen, Zeming Lin,  
511 Natalia Gimelshein, Luca Antiga, Alban Desmaison, Andreas Kopf, Edward Yang, Zachary DeVito, Martin Raison, Alykhan  
512 Tejani, Sasank Chilamkurthy, Benoit Steiner, Lu Fang, Junjie Bai, and Soumith Chintala. PyTorch: An Imperative Style,  
513 High-Performance Deep Learning Library. In *Advances in Neural Information Processing Systems*, volume 32. Curran  
514 Associates, Inc., 2019.
