# Supplementary material for: Delphi: Deep Learning for Polygenic Risk Prediction
Source: bioRxiv or medRxiv preprint supplement (doi:10.1101/2024.04.19.24306079), 2026-02-06
Supplement: Supplementary file [file media-1.pdf]

# Supplementary Note 1: Other Performance Metrics

We also show the performance of Delphi for continuous phenotypes in terms of mean absolute error. Delphi also consistently outperforms other methods w.r.t this metric.

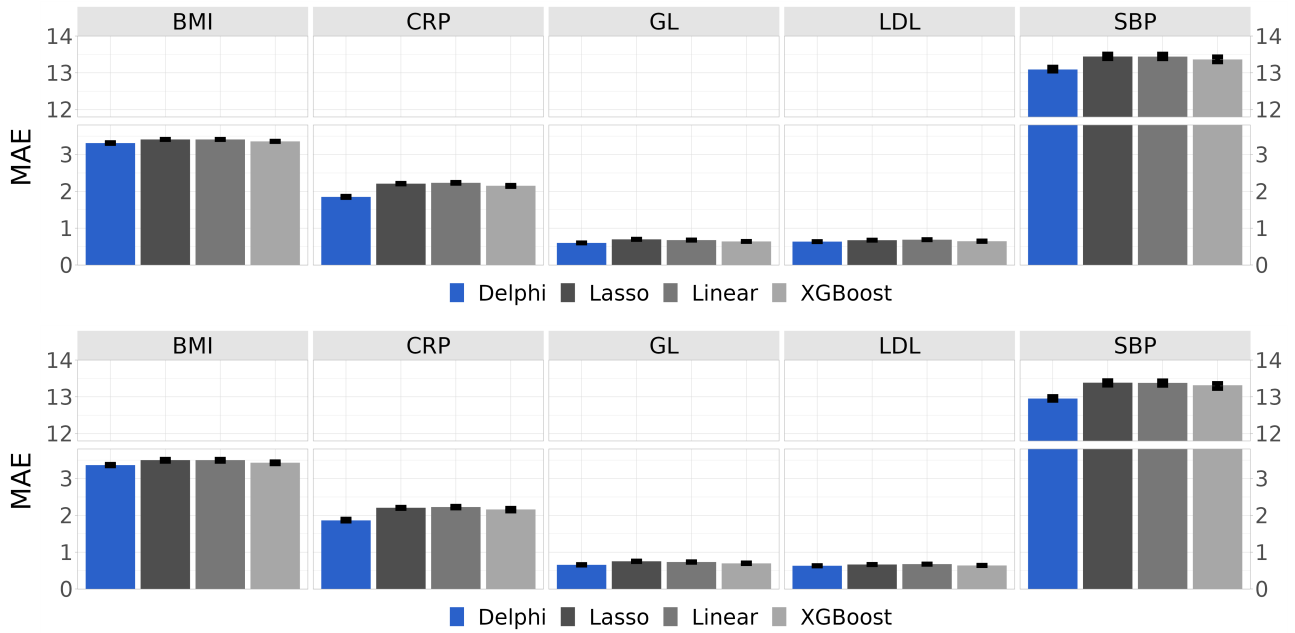

**Figure 1.** Mean absolute error of polygenic predictions for five phenotypes in the UK Biobank. Top: All participants; bottom: Individuals from non-British white ancestry. We report results for a linear PRS model, lasso regression, an XGBoost model including the dosage of multiple high-impact SNPs as input, and our method. See Figure 2 for acronyms.
